# Supplementary material
Source: Springer Nature journal article supplement (https://www.springermedizin.de/resource/supplementary/12916_2011_432_MOESM7_ESM.pdf/9599938)
Supplement: MOESM7 [file 9599938]

Potentially relevant citations identified and screened for retrieval from PubMed, EMBASE, WHO Regional Indexes and key bibliographies; duplicates eliminated (n=3,623)

Citations excluded based on abstract review (n=2,881)  
Anonymous reports (n=20)  
No abstract available (n=171)  
Case reports (n=232)  
Studies with pediatric cohorts (n=190)  
No assessment of TB outcome (n=1,515)  
Studies about risk factors for developing TB (n=55)  
Reviews (n=526)  
Studies published before 1980 (n=107)  
Studies with exclusively surgical outcomes (n=40)  
Studies exclusively about adherence (n=16)  
Studies lacking a comparison group (n=9)

Citations retrieved for more detailed evaluation (n=742)

Citations excluded after full text review (n=709)  
No assessment of TB outcome (n=74)  
DM not assessed (n=378)  
Effect estimate of association between DM and TB outcome not presented or calculable (n=142)  
Review (n=18)  
Case report (n=4)  
Studies lacking a control group (n=49)  
Studies grouping DM with other chronic diseases (n=26)  
Studies quantifying the reverse association between TB and DM (n=2)  
Studies with >50% of TB treatment prior to 1980 (n=6)  
TB treatment differed systematically between patients with and without DM (n=5)  
Studies assessing relapse that did not follow patients from first episode of TB (n=3)  
Duplicate study (n=2)

Studies included in analysis, by outcome (n=33)  
Culture conversion (n=9)  
Failure and Death (n=12)  
Death, not age-adjusted (n=23)  
Death, with age-adjusted multivariate analysis (n=4)  
Relapse (n=5)  
Drug resistant recurrent TB (n=4)
